# Supplementary material for: A comparison of the Cieplak model and the cation complexation model as applied to selected 2,3-disubstituted norbornan-7-ones †
Source: Royal Society of Chemistry journal article supplement (doi:10.1039/b008808k), 2001-01-01
Supplement: b008808k.doc [file b008808k.doc]

**Supplementary data**

**A comparison of the Cieplak model and the cation complexation model as applied to selected 2,3-disubstituted norbornan-7-ones**

**Veejendra K. Yadav* and Rengarajan Balamurugan**

*Department of Chemistry, Indian Institute of Technology, Kanpur 208 016, India*

**Cartesian coordinates of species 1a–1c and their complexes**

Norbornan-7-one

1 6 0.000000 0.000000 0.000000

2 6 0.000000 0.000000 1.547952

3 6 1.528727 0.000000 1.925521

4 6 2.249359 0.000485 0.555536

5 6 2.032829 -1.378075 -0.114477

6 6 0.504025 -1.378548 -0.491744

7 6 1.257356 0.844761 -0.260174

8 8 1.415874 1.853972 -0.902894

9 1 -0.915272 0.361449 -0.470418

10 1 -0.499129 0.893290 1.937978

11 1 -0.527180 -0.872761 1.947866

12 1 1.788850 0.892972 2.503558

13 1 1.809140 -0.873071 2.524424

14 1 3.278247 0.362360 0.565288

15 1 2.656373 -1.479211 -1.009004

16 1 2.294165 -2.197667 0.563414

17 1 0.368164 -1.480488 -1.573564

18 1 -0.042237 -2.198089 -0.012659

2,3-Bis(methoxymethyl)norbornan-7-one,(**1a**)

1 6 -0.948439 0.743217 -1.260655

2 6 -0.498045 0.502975 0.211841

3 6 1.084070 0.361708 0.099140

4 6 1.347518 0.508241 -1.426245

5 6 0.790822 -0.706662 -2.210982

6 6 -0.769215 -0.537082 -2.110606

7 6 0.260423 1.544298 -1.755120

8 8 0.343953 2.647090 -2.239447

9 1 -1.916567 1.232615 -1.362580

10 1 -0.702418 1.423974 0.770169

11 6 -1.236017 -0.636001 0.927590

12 1 1.538152 1.224102 0.601440

13 6 1.736676 -0.861994 0.738887

14 1 2.366884 0.801853 -1.683122

15 1 1.123019 -0.661754 -3.253454

16 1 1.134825 -1.664229 -1.809333

17 1 -1.209141 -0.391461 -3.102693

18 1 -1.263774 -1.404789 -1.667657

19 8 -2.649806 -0.500161 0.864524

20 1 -1.023371 -1.602322 0.460191

21 1 -0.895219 -0.693425 1.970906

22 6 -3.184233 0.448598 1.766339

23 8 1.635928 -0.736428 2.148218

24 1 2.798554 -0.904249 0.439078

25 1 1.274621 -1.807048 0.412319

26 6 2.243749 -1.809094 2.837800

27 1 -4.272829 0.372875 1.696251

28 1 -2.877770 0.236360 2.803162

29 1 -2.890705 1.480878 1.523608

30 1 2.117567 -1.618219 3.906567

31 1 1.774130 -2.774322 2.588486

32 1 3.319740 -1.879231 2.611186

2,3-Bis(methoxymethyl)norbornan-7-one; C=O..H+ (**1a**-H+)

1 6 -0.885755 0.874220 -1.234681

2 6 -0.331458 0.709689 0.242319

3 6 1.190827 0.297533 0.029821

4 6 1.340636 0.268386 -1.538023

5 6 0.538645 -0.914844 -2.161910

6 6 -0.963008 -0.509374 -1.944988

7 6 0.377273 1.372579 -1.805136

8 8 0.559415 2.536220 -2.300248

9 1 -1.761874 1.513214 -1.314657

10 1 -0.365731 1.698894 0.708821

11 6 -1.213250 -0.203448 1.095495

12 1 1.818400 1.106983 0.418301

13 6 1.696715 -0.970479 0.725461

14 1 2.362563 0.395593 -1.902080

15 1 0.773947 -1.008808 -3.225777

16 1 0.803178 -1.861203 -1.688794

17 1 -1.487247 -0.414210 -2.899510

18 1 -1.523162 -1.220204 -1.337362

19 8 -2.532142 0.266026 0.949510

20 1 -1.136198 -1.260118 0.790657

21 1 -0.863796 -0.142385 2.135923

22 6 -3.462097 -0.400136 1.796447

23 8 1.663313 -0.701473 2.105427

24 1 2.724898 -1.183951 0.385390

25 1 1.084176 -1.852823 0.482576

26 6 2.175956 -1.769123 2.897243

27 1 -4.440230 0.041838 1.599076

28 1 -3.500515 -1.477758 1.579763

29 1 -3.206611 -0.258726 2.855731

30 1 2.107598 -1.447497 3.937642

31 1 1.587531 -2.687747 2.760327

32 1 3.226342 -1.976964 2.649596

33 1 1.485154 2.699685 -2.585420

2,3-Bis(methoxymethyl)norbornan-7-one; C=O..Li+ (**1a**-Li+)

1 6 -0.856215 0.780775 -1.201422

2 6 -0.348674 0.631787 0.276288

3 6 1.168437 0.187991 0.106541

4 6 1.360756 0.150130 -1.445371

5 6 0.566062 -1.025946 -2.080720

6 6 -0.936405 -0.604297 -1.899134

7 6 0.428386 1.284181 -1.796963

8 8 0.673349 2.350400 -2.373365

9 1 -1.733968 1.415619 -1.310186

10 1 -0.367565 1.630202 0.727454

11 6 -1.250361 -0.238409 1.149260

12 1 1.802288 0.986909 0.507884

13 6 1.626658 -1.081711 0.826698

14 1 2.393530 0.255938 -1.780507

15 1 0.822569 -1.124585 -3.140062

16 1 0.802213 -1.979891 -1.605782

17 1 -1.440392 -0.515536 -2.866161

18 1 -1.512144 -1.313829 -1.302957

19 8 -2.553935 0.294552 1.044718

20 1 -1.239063 -1.294956 0.834474

21 1 -0.879518 -0.207712 2.183376

22 6 -3.488996 -0.358316 1.889490

23 8 1.613117 -0.803358 2.209500

24 1 2.645725 -1.341225 0.490420

25 1 0.982876 -1.946307 0.601102

26 6 2.065523 -1.893734 2.999481

27 1 -4.453118 0.130875 1.735565

28 1 -3.582782 -1.425909 1.638835

29 1 -3.203720 -0.269401 2.947909

30 1 2.021289 -1.569881 4.041059

31 1 1.426296 -2.779692 2.868346

32 1 3.101515 -2.165622 2.749161

33 3 0.847567 3.929178 -3.103878

2,3-Divinylnorbornan-7-one (**1b**)

1 6 0.000000 0.000000 0.000000

2 6 0.000000 0.000000 1.562671

3 6 1.564689 0.000000 1.925966

4 6 2.253222 0.000026 0.523160

5 6 2.040929 -1.351039 -0.200315

6 6 0.509376 -1.351065 -0.555901

7 6 1.243927 0.864554 -0.243735

8 8 1.381573 1.907112 -0.836624

9 1 -0.926133 0.367791 -0.443652

10 1 -0.409607 0.962670 1.890489

11 6 -0.831795 -1.076184 2.201202

12 1 1.787950 0.962660 2.400746

13 6 2.030047 -1.076205 2.865649

14 1 3.280079 0.367842 0.532964

15 1 2.652177 -1.390063 -1.107885

16 1 2.331252 -2.205817 0.416247

17 1 0.360527 -1.390124 -1.639942

18 1 -0.022878 -2.205847 -0.130300

19 6 -1.900436 -0.842345 2.965015

20 6 2.652851 -0.842394 4.022166

21 1 -0.542414 -2.109908 2.017696

22 1 -2.234828 0.169093 3.187874

23 1 -2.480515 -1.651520 3.400401

24 1 1.851098 -2.109921 2.573401

25 1 2.854867 0.169036 4.369571

26 1 2.981751 -1.651583 4.668581

2,3-Divinylnorbornan-7-one; C=O..H+ (**1b**-H+)

1 6 -1.027336 1.141457 0.067615

2 6 0.431504 0.809327 -0.502557

3 6 0.453884 -0.791965 -0.515628

4 6 -0.995020 -1.177149 0.043343

5 6 -1.104546 -0.819795 1.552385

6 6 -1.123806 0.750378 1.569781

7 6 -1.702103 -0.024429 -0.543961

8 8 -2.577112 -0.095287 -1.476852

9 1 -1.385953 2.137864 -0.196793

10 1 0.458761 1.151028 -1.542939

11 6 1.531350 1.515770 0.233747

12 1 0.491170 -1.115714 -1.560901

13 6 1.573492 -1.474900 0.212764

14 1 -1.332404 -2.170091 -0.250494

15 1 -2.027766 -1.229607 1.970466

16 1 -0.275781 -1.249611 2.116395

17 1 -2.054307 1.129928 2.000432

18 1 -0.302946 1.189820 2.137872

19 6 2.274604 2.477646 -0.318625

20 6 2.339034 -2.414004 -0.348366

21 1 1.728348 1.218587 1.260738

22 1 2.126856 2.805888 -1.345256

23 1 3.071415 2.965026 0.235010

24 1 1.763408 -1.182874 1.242673

25 1 2.196721 -2.737909 -1.377054

26 1 3.147146 -2.887527 0.200930

27 1 -2.894122 0.783468 -1.779244

2,3-Divinylnorbornan-7-one; C=O..Li+ (**1b**-Li+)

1 6 0.000000 0.000000 0.000000

2 6 0.000000 0.000000 1.577385

3 6 1.562134 0.000000 1.938612

4 6 2.254686 -0.001431 0.521406

5 6 2.037756 -1.362313 -0.193881

6 6 0.507401 -1.360874 -0.548752

7 6 1.237223 0.828937 -0.212041

8 8 1.369889 1.918929 -0.782892

9 1 -0.921592 0.376091 -0.445395

10 1 -0.413142 0.961233 1.904221

11 6 -0.842179 -1.079122 2.197167

12 1 1.790037 0.961742 2.412560

13 6 2.046642 -1.078135 2.866340

14 1 3.278784 0.373177 0.525828

15 1 2.651736 -1.418689 -1.097751

16 1 2.330325 -2.198842 0.442968

17 1 0.353908 -1.415324 -1.630716

18 1 -0.036959 -2.197216 -0.107008

19 6 -1.942493 -0.834391 2.910643

20 6 2.720494 -0.832136 3.991081

21 1 -0.530144 -2.111060 2.051564

22 1 -2.295564 0.177922 3.096573

23 1 -2.529368 -1.638424 3.344566

24 1 1.831578 -2.110433 2.598810

25 1 2.954850 0.180569 4.312816

26 1 3.057284 -1.635502 4.639429

27 3 1.545352 3.457063 -1.593443

2,3-Divinylnorbornan-7-one; C=O...BH3 (**1b**-BH3)

1 6 0.000000 0.000000 0.000000

2 6 0.000000 0.000000 1.569889

3 6 1.561371 0.000000 1.937372

4 6 2.252564 -0.002344 0.529022

5 6 2.042771 -1.359455 -0.190797

6 6 0.514025 -1.355995 -0.551547

7 6 1.241425 0.834708 -0.220247

8 8 1.442842 1.903909 -0.793768

9 1 -0.919475 0.371024 -0.445386

10 1 -0.412403 0.961792 1.894187

11 6 -0.837915 -1.079230 2.195454

12 1 1.785880 0.963374 2.409206

13 6 2.034247 -1.075886 2.873480

14 1 3.275263 0.375369 0.533565

15 1 2.658464 -1.403563 -1.094502

16 1 2.332856 -2.205264 0.436761

17 1 0.366936 -1.398160 -1.635007

18 1 -0.028399 -2.200585 -0.120699

19 6 -1.930404 -0.843041 2.923607

20 6 2.682216 -0.836133 4.014719

21 1 -0.531890 -2.111690 2.035218

22 1 -2.281480 0.168025 3.119771

23 1 -2.515100 -1.651516 3.353647

24 1 1.836968 -2.109614 2.594547

25 1 2.901711 0.176295 4.347857

26 1 3.013943 -1.642410 4.662977

27 5 0.363901 2.843037 -1.581646

28 1 0.831922 2.892120 -2.693785

29 1 -0.709854 2.291141 -1.505338

30 1 0.443611 3.883948 -0.973903

2,3-Bis(methoxycarbonyl)norbornan-7-one (**1c**)

1 6 0.000000 0.000000 0.000000

2 6 0.000000 0.000000 1.567566

3 6 1.546254 0.000000 1.920974

4 6 2.248448 -0.125794 0.549493

5 6 1.938420 -1.498879 -0.102381

6 6 0.439289 -1.376336 -0.554591

7 6 1.304446 0.776655 -0.256982

8 8 1.508830 1.771118 -0.907451

9 1 -0.901085 0.425545 -0.442337

10 1 -0.463695 0.924207 1.919436

11 6 -0.800193 -1.156883 2.130944

12 1 1.768462 0.991767 2.336296

13 6 2.012541 -0.977528 2.988263

14 1 3.297277 0.168795 0.554230

15 1 2.597805 -1.665585 -0.959587

16 1 2.092749 -2.314047 0.604524

17 1 0.354459 -1.366086 -1.646635

18 1 -0.171332 -2.200619 -0.181044

19 8 -0.391017 -2.288174 2.298742

20 8 2.912537 -1.778483 2.874813

21 8 -2.073486 -0.783782 2.371269

22 8 1.336808 -0.762227 4.139304

23 6 -2.945485 -1.825727 2.843595

24 6 1.658524 -1.659452 5.215481

25 1 -3.916228 -1.350808 2.986315

26 1 -3.014439 -2.630924 2.107475

27 1 -2.574295 -2.236170 3.786067

28 1 1.053828 -1.330705 6.061320

29 1 1.404933 -2.685093 4.935501

30 1 2.722686 -1.603559 5.457627

2,3-Bis(methoxycarbonyl)norbornan-7-one; C=O...H+ (**1c**-H+)

1 6 -0.596274 0.738492 -1.786498

2 6 -0.661165 0.779775 -0.208361

3 6 0.868575 0.812701 0.205513

4 6 1.638975 0.630098 -1.140093

5 6 1.346256 -0.781190 -1.759495

6 6 -0.124820 -0.665410 -2.296606

7 6 0.711089 1.425815 -1.973862

8 8 1.032065 2.430408 -2.691478

9 1 -1.468121 1.159847 -2.290493

10 1 -1.157184 1.701158 0.102642

11 6 -1.461852 -0.399173 0.343971

12 1 1.074192 1.815714 0.599268

13 6 1.344604 -0.151419 1.298151

14 1 2.681726 0.940965 -1.121497

15 1 2.053529 -0.990252 -2.565126

16 1 1.458921 -1.545533 -0.992893

17 1 -0.160904 -0.691338 -3.389983

18 1 -0.775157 -1.453191 -1.916297

19 8 -1.007865 -1.515807 0.480621

20 8 2.281487 -0.903850 1.173574

21 8 -2.716625 -0.033978 0.598550

22 8 0.628840 0.042529 2.407351

23 6 -3.595426 -1.072391 1.105176

24 6 0.964653 -0.811846 3.531763

25 1 -4.556036 -0.583419 1.256751

26 1 -3.677408 -1.881250 0.376328

27 1 -3.202402 -1.463213 2.045476

28 1 0.317726 -0.482882 4.343392

29 1 0.768423 -1.853459 3.270248

30 1 2.016527 -0.685955 3.793998

31 1 0.275260 2.825674 -3.178716

2,3-Bis(methoxycarbonyl)norbornan-7-one; C7=O..H+ and ester C=O..H+ (**1c**-2H+)

1 6 -0.502436 0.621520 -1.910437

2 6 -0.697301 0.726262 -0.350081

3 6 0.802527 0.847188 0.196997

4 6 1.679105 0.807064 -1.089434

5 6 1.632817 -0.619933 -1.751020

6 6 0.189302 -0.708610 -2.371716

7 6 0.745077 1.457247 -2.036507

8 8 1.045469 2.388520 -2.840113

9 1 -1.373188 0.927675 -2.493470

10 1 -1.227818 1.654812 -0.126958

11 6 -1.542306 -0.338131 0.295901

12 1 0.880893 1.838892 0.658422

13 6 1.279548 -0.127223 1.280062

14 1 2.668940 1.247825 -0.982565

15 1 2.404421 -0.703213 -2.519054

16 1 1.835340 -1.377679 -0.993876

17 1 0.224457 -0.729070 -3.465004

18 1 -0.372972 -1.586823 -2.056507

19 8 -1.233209 -1.581762 0.117710

20 8 2.380921 -0.611165 1.289793

21 8 -2.549725 0.069732 0.956823

22 8 0.334595 -0.279870 2.221272

23 6 -3.478789 -0.827577 1.684004

24 6 0.753403 -1.015239 3.421535

25 1 -4.198403 -0.149780 2.137710

26 1 -3.972332 -1.486923 0.965999

27 1 -2.917184 -1.363658 2.452230

28 1 -0.096757 -0.962473 4.099157

29 1 0.997061 -2.045419 3.157181

30 1 1.626007 -0.526175 3.855327

31 1 0.329602 2.676148 -3.454255

32 1 -1.798156 -2.233169 0.585959

2,3-Bis(methoxycarbonyl)norbornan-7-one; C7=O..Li+ and ester C=O..Li+ (**1c**-2Li+)

1 6 -0.533868 0.580583 -1.732979

2 6 -0.819332 0.594949 -0.187409

3 6 0.639318 0.676907 0.455548

4 6 1.589163 0.682892 -0.796393

5 6 1.566640 -0.690963 -1.524320

6 6 0.130491 -0.758030 -2.163485

7 6 0.704829 1.455063 -1.756486

8 8 0.946623 2.459008 -2.417824

9 1 -1.374799 0.915579 -2.339940

10 1 -1.313986 1.540842 0.046317

11 6 -1.847463 -0.469213 0.190023

12 1 0.712181 1.660322 0.926323

13 6 1.138665 -0.290423 1.526108

14 1 2.574943 1.104129 -0.599238

15 1 2.343743 -0.719032 -2.292706

16 1 1.768805 -1.511109 -0.833519

17 1 0.184990 -0.813578 -3.253973

18 1 -0.449344 -1.619585 -1.827574

19 8 -1.628156 -1.656398 0.440596

20 8 0.968613 -1.511452 1.552520

21 8 -3.054169 0.040207 0.138678

22 8 1.864338 0.351018 2.409256

23 6 -4.199343 -0.832991 0.392595

24 6 2.508441 -0.412581 3.477733

25 1 -5.068846 -0.197880 0.240452

26 1 -4.188954 -1.665583 -0.311840

27 1 -4.155964 -1.195529 1.420461

28 1 3.082949 0.324150 4.034365

29 1 1.743598 -0.868910 4.107787

30 1 3.155987 -1.175456 3.043579

31 3 1.346797 3.906647 -3.436788

32 3 -0.366302 -2.724842 1.226147
